# Supplementary material
Source: publisher figshare collection journal article supplement (https://springernature.figshare.com/ndownloader/files/15033776)
Supplement: Supplementary file 1 [file 15033776]

case_id	session_id	TIME_pre1_post2	Alb_0orFFP_1	Anticoa_NM_1	SePE_0orSePE+HD_1	IgM_Titers	IgG_Titers	Fib	F13	IgM	IgG	SBP	DBP	PR	Side-effects
1	1	1	0	0	0	16	256	211		30	846	173	90	93	0
1	1	2	0	0	0	8	128	142		27	241	153	80	92	0
1	1	1	0	0	0	8	256	211		30	846	173	90	93	0
1	1	2	0	0	0	4	128	142		27	241	153	80	92	0
1	2	1	0	1	0	4	32	179		35	414	157	90	81	0
1	2	2	0	1	0	2	16	114		32	134	129	78	91	0
1	2	1	0	1	0	4	16	179		35	414	157	90	81	0
1	2	2	0	1	0	2	8	114		32	134	129	78	91	0
1	3	1	0	0	0	4	64	197		32	345	137	71	92	1
1	3	2	0	0	0	2	32	142		33	99	126	62	107	1
1	3	1	0	0	0	4	32	197		32	345	137	71	92	1
1	3	2	0	0	0	2	8	142		33	99	126	62	107	1
1	4	1	0	0	0	16	256	186		36	313	118	61	92	0
1	4	2	0	0	0	4	128	130		31	94	116	62	88	0
1	4	1	0	0	0	16	512	186		36	313	118	61	92	0
1	4	2	0	0	0	8	256	130		31	94	116	62	88	0
1	5	1	0	0	0	8	128	164		30	1328	135	74	83	0
1	5	2	0	0	0	4	64	114		29	449	155	82	89	0
1	5	1	0	0	0	16	256	164		30	1328	135	74	83	0
1	5	2	0	0	0	8	128	114		29	449	155	82	89	0
1	6	1	0	0	0	8	64	162		31	531	144	76	79	0
1	6	2	0	0	0	8	32	122		26	176	133	74	85	0
1	6	1	0	0	0	16	128	162		31	531	144	76	79	0
1	6	2	0	0	0	8	128	122		26	176	133	74	85	0
2	7	1	0	0	1	1024	1024	246		41	928	145	88	72	0
2	7	2	0	0	1	512	1024	171		33	350	156	83	69	0
2	8	1	0	0	1	1024	1024	198		39	581	158	89	65	0
2	8	2	0	0	1	512	1024	159		35	254	163	80	58	0
3	9	1	0	0	1	4	32	252		41	827	168	90	77	0
3	9	2	0	0	1	2	8	147		34	176	179	89	87	0
4	10	1	0	0	1	2	2	87		28	458	145	100	65	1
4	10	2	0	0	1	1	1	63		24	126	123	89	98	1
5	11	1	0	0	1	2	16	181				147	88	60	0
5	11	2	0	0	1	2	4	165				108	57	63	0
6	12	1	0	0	0	4	8	183		27	548	141	89	68	0
6	12	2	0	0	0	2	8	109		22	136	118	72	76	0
7	13	1	0	0	0	2	1	297		46	956	108	57	55	0
7	13	2	0	0	0	2	0.5	175		36	275	115	52	57	0
8	14	1	1	0	1	4	8	155	39	19	598	115	79	86	1
8	14	2	1	0	1	2	2	159	52	31	391	107	80	83	1
9	15	1	1	0	1	2	2	126	29	33	598	147	77	62	1
9	15	2	1	0	1	1	0.5	144	50	41	473	131	67	62	1
10	16	1	1	0	1	1	2	101	37	18	449	141	68	51	0
10	16	2	1	0	1	0.5	1	130	51	59	434	134	58	51	0
11	17	1	1	0	1	64	64	404	142	76	954	112	62	85	0
11	17	2	1	0	1	32	32	366	140	108	708	132	72	75	0
11	18	1	1	1	1	32	64	310		39	577	132	74	76	0
11	18	2	1	1	1	8	16	310		41	593	133	67	81	0
11	19	1	0	1	1	4	8	159	43	29	420	117	57	74	1
11	19	2	0	1	1	2	4	142	45	29	386	68	41	96	1
12	20	1	1	0	1	2	2	138		53	595	140	87	112	0
12	20	2	1	0	1	1	1	187		68	566	127	83	107	0
13	21	1	1	1	1	8	8	107	52	22	673	207	103	75	1
13	21	2	1	1	1	1	2	157	65	36	520	188	84	70	1
14	22	1	0	1	0	8	8	270	161	64	986	164	94	87	0
14	22	2	0	1	0	4	4	210	121	45	373	130	80	95	0
14	23	1	1	1	0	8	8	286	152	56	526	149	92	84	1
14	23	2	1	1	0	4	4	296	160	81	527	118	72	85	1
15	24	1	1	1	1	16	8	171	43	41	641	132	69	91	0
15	24	2	1	1	1	4	2	209	64	65	574	142	74	92	0
15	25	1	1	1	1	16	16	276	83	77	777	142	82	80	1
15	25	2	1	1	1	4	2	268	97	84	596	150	86	85	1
16	26	1	0	0	1	2	1	316	107	167	1116	123	88	68	1
16	26	2	0	0	1	1	0.5	257	107	150	459	120	79	95	1
16	27	1	0	0	1	2	1	276	104	159	629	111	81	68	0
16	27	2	0	0	1	1	0.5	230	98	147	272	112	77	98	0
17	28	1	0	0	1	4	4	424	142	54	1010	168	80	60	0
17	28	2	0	0	1	2	2	424	142	54	1010	168	80	60	0
17	29	1	0	1	1	2	2	328	105	46	565	144	76	63	0
17	29	2	0	1	1	1	1	190	79	34	119	151	82	63	0
18	30	1	0	0	1	4	8	354	96	31	749	142	88	92	0
18	30	2	0	0	1	2	4	212	74	23	246	145	92	84	0
18	31	1	0	0	1	2	4	219	62	25	370	129	81	80	0
18	31	2	0	0	1	2	2	176	55	20	133	124	75	99	0
19	32	1	0	0	1	4	4	295	84	88	996	134	56	80	0
19	32	2	0	0	1	4	4	211	81	77	355	136	82	71	0
19	33	1	0	0	1	4	4	220	74	76	536	127	79	84	0
19	33	2	0	0	1	4	4	220	74	76	536	127	79	84	0
20	34	1	0	0	1	2	2	340	133	27	1291	128	73	76	0
20	34	2	0	0	1	1	2	279	110	22	531	120	68	99	0
20	35	1	0	0	1	2	2	304	113	25	746	137	79	67	0
20	35	2	0	0	1	1	1	240	103	21	294	133	75	82	0
21	36	1	0	0	0	2	4	338	79	57	845	151	76	55	0
21	36	2	0	0	0	1	1	215	61	43	230	136	62	54	0
21	37	1	0	0	0	2	2	331	70	55	454	154	80	53	0
21	37	2	0	0	0	2	2	214	54	41	133	130	67	57	0
21	38	1	0	0	0	2	2	324	62	51	285	166	90	55	0
21	38	2	0	0	0	2	2	265	77	63	86	135	66	57	0
22	39	1	1	0	1	8	8	390	124	31	814	158	96	84	0
22	39	2	1	0	1	4	2	409	140	43	494	150	90	82	0
22	40	1	1	0	1	4	4	419	121	38	545	165	108	83	0
22	40	2	1	0	1	2	1	398	152	60	447	150	88	88	0
23	41	1	0	1	0	32	32	308		53	1538	133	87	75	1
23	41	2	0	1	0	8	8	184		43	495	122	71	82	1
23	42	1	0	1	0	4	8	240	121	48	904	146	86	74	0
23	42	2	0	1	0	4	8	142	85	40	261	161	90	85	0
24	43	1	0	1	0	8	8	433	140	46	858	158	81	71	1
24	43	2	0	1	0	4	4	275	94	29	346	141	80	82	1
25	44	1	0	0	1	8	8	272	143	67	1030	142	75	68	0
25	44	2	0	0	1	8	8	229	130	66	376	124	75	79	0
25	45	1	0	0	1	4	4	264	127	65	518	128	72	72	0
25	45	2	0	0	1	2	2	197	118	58	188	108	64	80	0
26	46	1	0	1	0	1	0.5	393	139	66	787	187	97	71	0
26	46	2	0	1	0	1	0.5	376	139	66	787	163	83	63	0
27	47	1	0	0	1	8	8	264	104	25	943	156	87	57	0
27	47	2	0	0	1	8	8	174	73	23	327	160	80	62	0
27	48	1	0	0	1	16	8	222	96	23	658	161	99	72	0
27	48	2	0	0	1	8	8	214	76	21	252	170	89	73	0
28	49	1	0	1	0	32	16					139	72	56	1
28	49	2	0	1	0	8	16					128	67	60	1
28	50	1	0	1	0	32	16	250	107	59	265	135	69	58	1
28	50	2	0	1	0	32	16	154	76	46	84	124	57	68	1
28	51	1	1	1	0	16	8	247	84	57	161	136	73	57	1
28	51	2	1	1	0	4	4	249	116	82	161	136	73	57	1
29	52	1	0	1	0	32	128	310	86	116	544	129	68	87	0
29	52	2	0	1	0	32	64	229	82	106	544	129	68	87	0
29	53	1	0	1	1	4	32	203	77	76	938	128	79	49	0
29	53	2	0	1	1	4	32	157	61	68	318	130	74	53	0
29	54	1	1	1	1	8	32	189	56	79	511	122	75	55	1
29	54	2	1	1	1	2	16	213	86	91	405	139	72	61	1
30	55	1	1	0	1	16	128	378	140	68	1120	140	95	72	1
30	55	2	1	0	1	4	32	354	143	82	779	136	87	70	1
30	56	1	0	0	1	4	32	399	125	74	913	145	88	72	0
30	56	2	0	0	1	2	32	318	147	67	510	140	80	62	0
30	57	1	1	0	1	2	32	337		62	668	141	87	75	0
30	57	2	1	0	1	2	16	350		94	529	142	80	62	0
30	58	1	1	0	1	8	128	345		79	602	135	90	79	1
30	58	2	1	0	1	8	32	325		90	291	135	80	68	1
